# Supplementary material for: Encapsulation of AgInS2/GaSx core/shell quantum dots in In-fumarate metal–organic frameworks for stability enhancement
Source: Royal Society of Chemistry journal article supplement (doi:10.1039/d2ce00343k), 2022-01-01
Supplement: d2ce00343k1.pdf [file d2ce00343k1.pdf]

## Supplementary information for

# Encapsulation of AgInS<sub>2</sub>/GaS<sub>x</sub> core/shell quantum dots in In-fumarate metal–organic frameworks for stability enhancement

Manunya Tepeakidarekul,<sup>a</sup> Taro Uematsu,<sup>\*a,b</sup> Tsukasa Torimoto<sup>c</sup> and Susumu Kuwabata<sup>\*a,b</sup>

<sup>a</sup>Department of Applied Chemistry, Graduate School of Engineering, Osaka University, 2-1 Yamada-oka, Suita 565-0871, Japan.

<sup>b</sup>Innovative Catalysis Science Division, Institute for Open and Transdisciplinary Research Initiatives (ICS-OTRI), Osaka University, Suita 565-0871, Japan.

<sup>c</sup>Department of Materials Chemistry, Graduate School of Engineering, Nagoya University, Chikusa-ku, Nagoya 464-8603, Japan

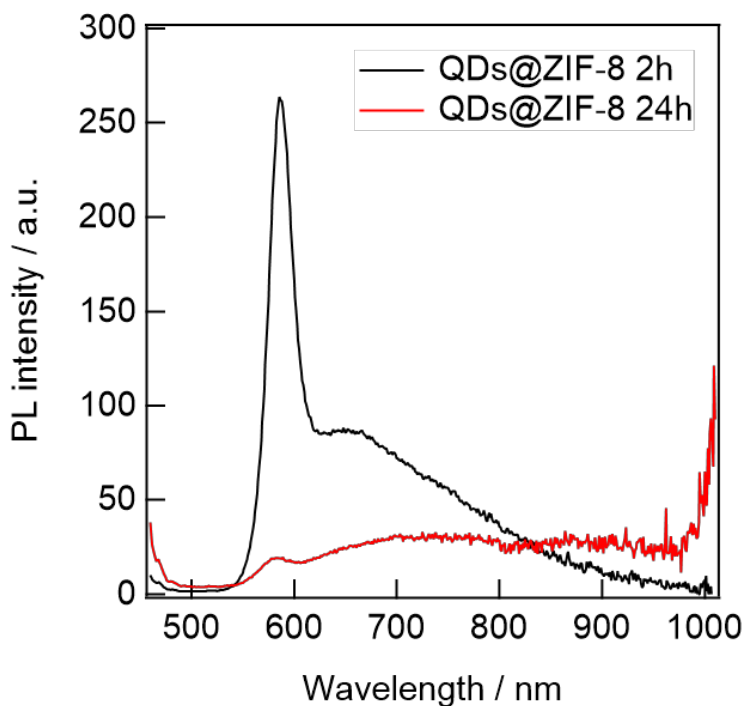

Fig. S1. PL spectra of QDs@ZIF-8 composites at different reaction times during the synthesis.

**Table S1. Size and PL properties for QDs, InMOFs, and QDs@InMOFs composites.**

| Samples                                  | Particle Size<br>(nm)  | Emission<br>(nm) | FWHM (nm) | PLQY (%)  |         |
|------------------------------------------|------------------------|------------------|-----------|-----------|---------|
|                                          |                        |                  |           | Band Edge | Overall |
| OLA-AgInS <sub>2</sub>                   | 3.29±0.51 <sup>a</sup> | 786              | 180.3     | -         | 75.2    |
| OLA-AgInS <sub>2</sub> /GaS <sub>x</sub> | 4.89±0.74 <sup>a</sup> | 574              | 35.9      | 76.4      | 87.4    |
| 6AH-AgInS <sub>2</sub> /GaS <sub>x</sub> | 3.60±0.64 <sup>a</sup> | 575              | 36.4      | 30.6      | 37.6    |
| InMOFs                                   | 536±90 <sup>b</sup>    | -                | -         | -         | -       |
| QDs@InMOFs pH 1.8                        | 266±27 <sup>b</sup>    | 581              | 33.3      | 1.4       | 3.7     |
| QDs@InMOFs pH 2.4                        | 34.2±8.3 <sup>b</sup>  | 581              | 33.6      | 4.6       | 8.9     |
| QDs@InMOFs pH 3.0                        | 34.2±7.3 <sup>b</sup>  | 581              | 32.6      | 5.3       | 10.7    |
| QDs@InMOFs pH 3.3                        | 40.8±10.4 <sup>b</sup> | 581              | 33.4      | 8.1       | 12.6    |

<sup>a</sup>Sizes of the QDs and <sup>b</sup>sizes of the InMOFs were provided.

**Table S2. PL decay components for pristine QDs and QDs@InMOFs composites**

| Sample                                   | $\lambda_{PL}$ (nm) | $\langle\tau\rangle$ (ns) | $\tau_1$ (ns) | A <sub>1</sub> | $\tau_2$ (ns) | A <sub>2</sub> | $\chi^2$ |
|------------------------------------------|---------------------|---------------------------|---------------|----------------|---------------|----------------|----------|
| OLA-AgInS <sub>2</sub> /GaS <sub>x</sub> | 573                 | 84.26                     | 46.18         | 945.36         | 172.39        | 109.43         | 1.00     |
| 6AH-AgInS <sub>2</sub> /GaS <sub>x</sub> | 575                 | 189.85                    | 61.06         | 861.57         | 349.43        | 121.5          | 1.15     |
| QDs@InMOFs pH 1.8                        | 581                 | 101.86                    | 22.56         | 936.46         | 168.41        | 146.69         | 0.94     |
| QDs@InMOFs pH 3.3                        | 581                 | 139.16                    | 41.67         | 905.61         | 254           | 126.14         | 0.90     |

**Table S3. The atomic ratio (%) of each component in QDs@InMOFs composites**

| Sample            | S    | Ag   | In    | Ga   |
|-------------------|------|------|-------|------|
| QDs@InMOFs pH 1.8 | 1.47 | 0.55 | 97.50 | 0.47 |
| QDs@InMOFs pH 2.4 | 1.78 | 0.49 | 97.26 | 0.48 |
| QDs@InMOFs pH 3.0 | 2.43 | 0.70 | 96.16 | 0.72 |
| QDs@InMOFs pH 3.3 | 2.61 | 0.69 | 96.03 | 0.67 |

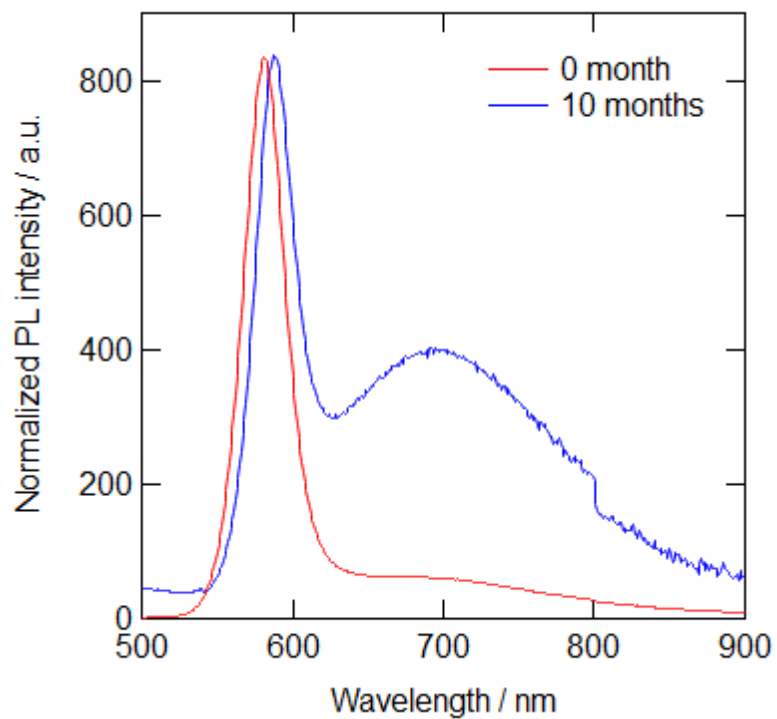

Fig. S2. PL spectra of the QDs@InMOF composites (red line) on the same day and (blue line) 10 months after preparation. The PL QYs were 12% and 5% in this order.
